# Supplementary material for: The Effects of Heatwaves on Human Morbidity in Primary Care Settings: A Case-Crossover Study
Source: MDPI journal article supplement (doi:10.3390/ijerph19020832), 2022-01-12
Supplement: s1 [file s1]

*Average Number of Events Per Day in Heat and Non-Heatwave Days*

| ICPCC                    | HW        |      | non-HW    |      |
|--------------------------|-----------|------|-----------|------|
|                          | $\bar{X}$ | IQR  | $\bar{X}$ | IQR  |
| General and heat-related |           |      |           |      |
| A04                      | 3         | 2    | 4         | 3.75 |
| A05                      | 1         | 0    | 1         | 0    |
| A06                      | 1         | 1    | 1         | 1    |
| A88                      | 3         | 3    | 1         | 1    |
| T11                      | 1         | 0    | 1         | 0    |
| K88                      | 1         | 0    | 1         | 1    |
| Cardiovascular           |           |      |           |      |
| K74                      | 1         | 0.25 | 1         | 0.75 |
| K75                      | 1         | 1    | 1         | 0.75 |
| K76                      | 1         | 1    | 1         | 0    |
| K78                      | 1         | 1    | 1         | 1    |
| K79                      | 1         | 0    | 1         | 0    |
| K80                      | 1         | 0    | 1         | 1    |
| K89                      | 1         | 1    | 1         | 0    |
| K90                      | 1         | 1    | 1         | 1    |
| Respiratory              |           |      |           |      |
| R02                      | 1         | 1    | 1         | 1    |
| URTI                     | 38        | 43   | 50        | 59   |
| LRTI                     | 8         | 9    | 12        | 9    |
| R80                      | 4         | 3    | 5         | 4    |
| R95                      | 2         | 1    | 1         | 1    |
| R96                      | 3         | 4    | 4         | 4    |

Notes.  $\bar{X}$ = median, IQR= interquartile range, ICPCC= International Classification of Primary Care code, HW= heatwave. For the meaning of the codes, refer to Table 1.
